# Supplementary material
Source: PubMed Central journal article supplement (PMC4144860)
Supplement: NIHMS618087-supplement-Supplementary_Data.pdf [file NIHMS618087-supplement-Supplementary_Data.pdf]

Natural Product Studies of US Endangered Plants: Volatile Components of  
*Lindera melissifolia* (Lauraceae) Repel Mosquitoes and Ticks

Joonseok Oh , John J. Bowling , John F. Carroll, Betul Demirci, K.Hüsnü Can Başer, Theodor D.  
Leininger, Ulrich R. Bernier, Mark T. Hamann

Supplementary Data

|                                                                                                                                                                                                                                                                                       |          |
|---------------------------------------------------------------------------------------------------------------------------------------------------------------------------------------------------------------------------------------------------------------------------------------|----------|
| <b>Fig. S1. Photos of <i>Lindera melissifolia</i> in the field under canopy, its unripe drupes, inflorescence and ripened drupes used for the volatile oil extraction .....</b>                                                                                                       | <b>2</b> |
| <b>Fig. S2. Herbarium voucher deposited at the Southern Hardwoods Laboratory Sharkey County, Mississippi (U.S.) .....</b>                                                                                                                                                             | <b>3</b> |
| <b>Fig. S3. gHSQC spectrum of the pondberry essential oil and identified major components of the oil (CDCl<sub>3</sub>). (i) (<i>E</i>)-<math>\beta</math>-ocimene, (ii) sabinene, (iii) <math>\alpha</math>-phellandrene, (iv) limonene, (v) <i>p</i>-cymene, (vi) myrcene .....</b> | <b>4</b> |
| <b>Fig. S4. <sup>13</sup>C NMR and GC-MS spectrum of <i>trans</i>-sabinene hydrate.....</b>                                                                                                                                                                                           | <b>5</b> |
| <b>Table S1 Mosquito repellency of <i>Lindera melissifolia</i> essential oil and hexanes extract .....</b>                                                                                                                                                                            | <b>6</b> |
| <b>Table S2 Mosquito repellency minimum effective dose of the fractions generated by fractional freezing .....</b>                                                                                                                                                                    | <b>6</b> |
| <b>Table S3 Components identified in the collected essential oil fractions generated by fractional freezing .....</b>                                                                                                                                                                 | <b>7</b> |

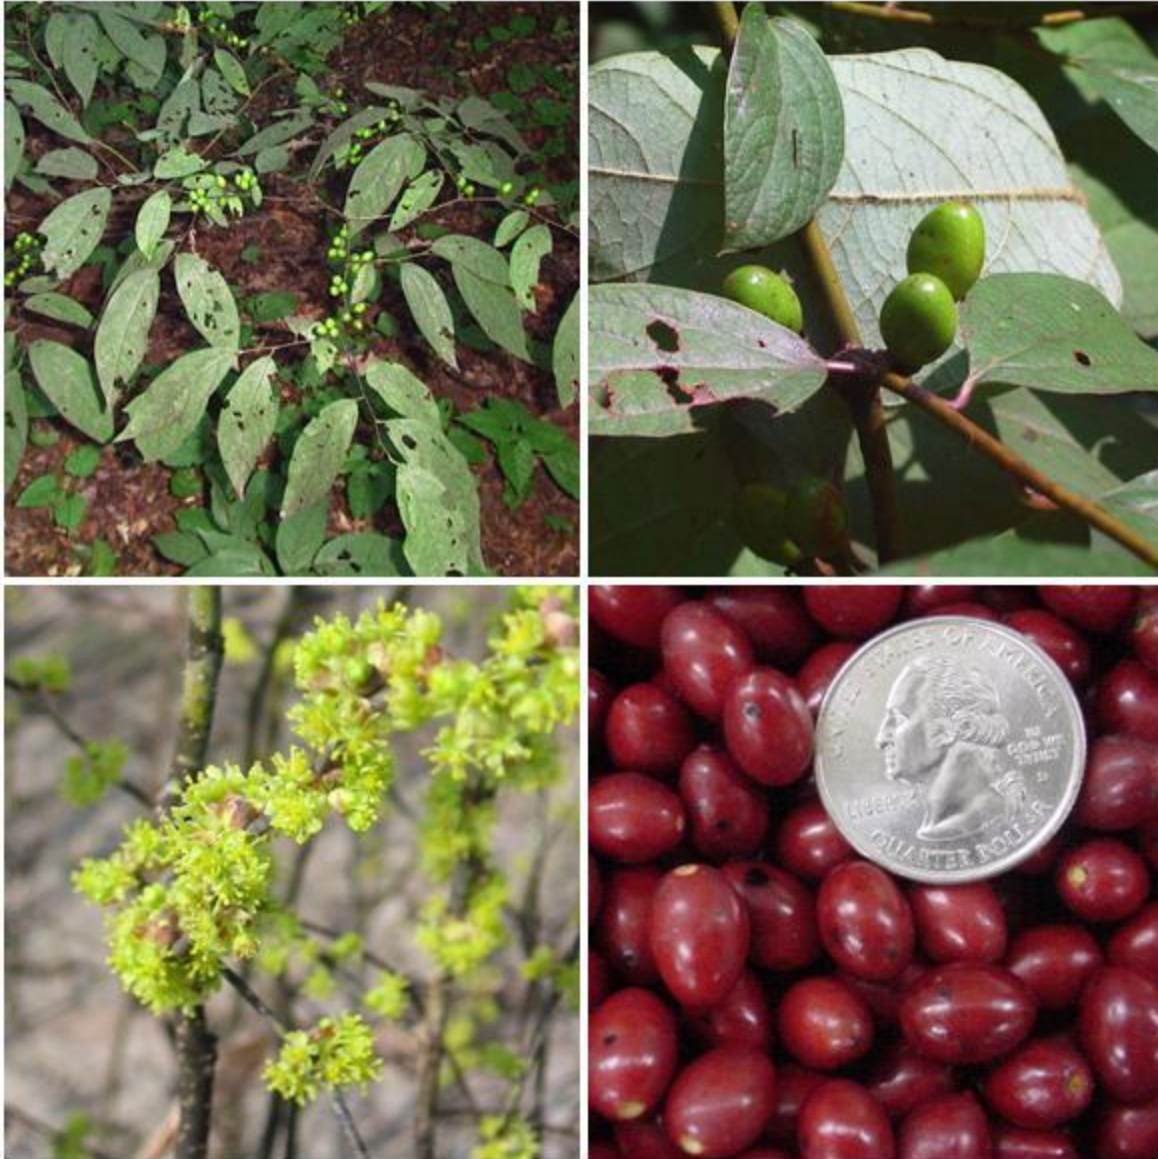

**Fig. S1. Photos of *Lindera melissifolia* in the field under canopy, its unripe drupes, inflorescence and ripened drupes used for the volatile oil extraction (Photo credit: Dr. Theodor D. Leininger)**

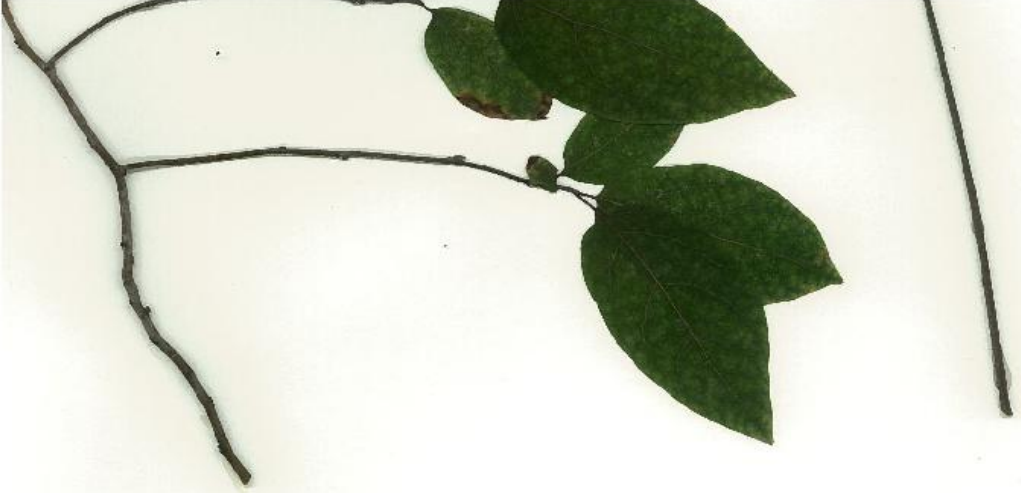

Herbarium of the U.S. Forest Service  
Southern Hardwoods Laboratory  
Mississippi

Sharkey County

*Lindera melissifolia* (Walt.) Blume Lauraceae

GSRC colony 20 F, Delta National Forest. 36°  
26'32.9''N, 71°45'52''E. Collected from  
potted plants in greenhouse at U.S. Forest  
Service, Southern Hardwoods Laboratory,  
Washington Co., MS.

D. Skojac w/ T. Hawkins 27 September 2005

#01157

**Fig. S2. Herbarium voucher deposited at the Southern Hardwoods Laboratory Sharkey County, Mississippi (U.S.)**

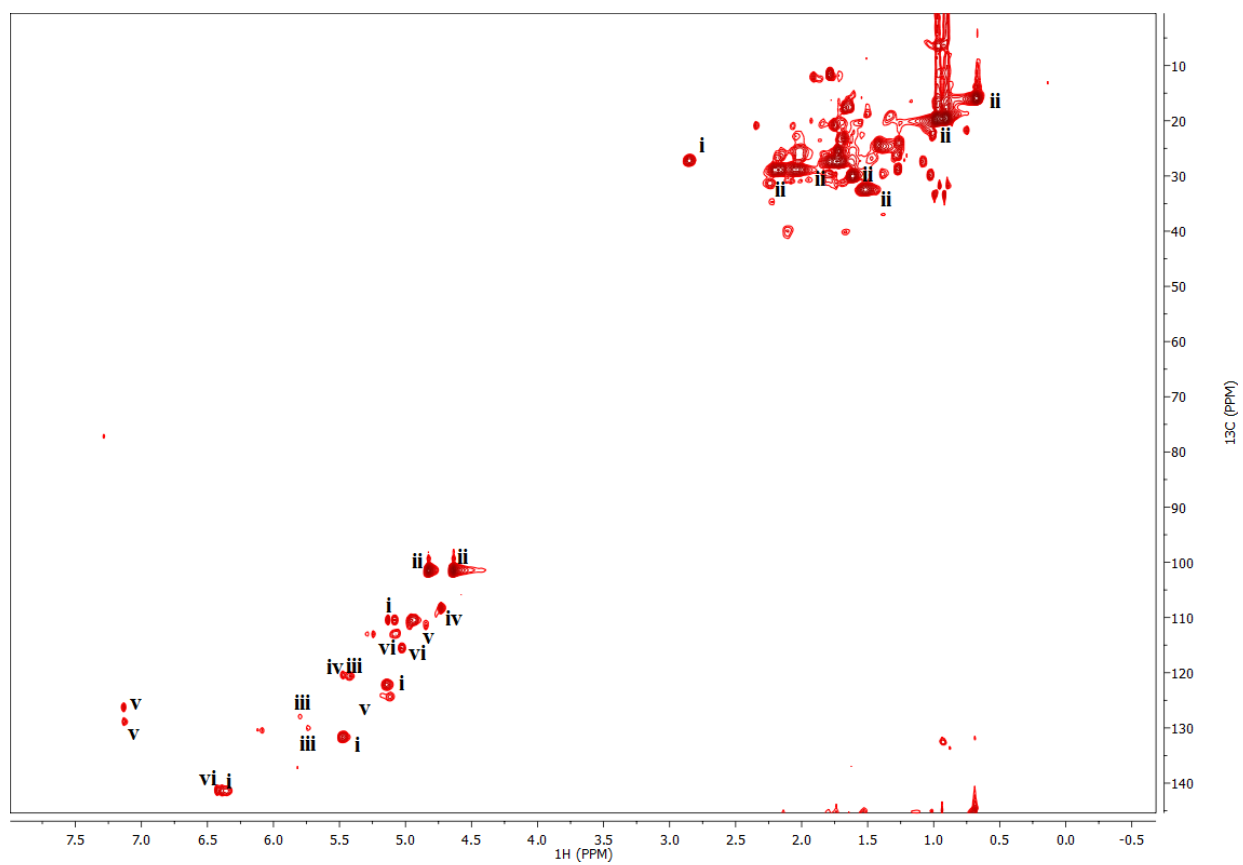

**Fig. S3.** gHSQC spectrum of the pondberry essential oil and identified major components of the oil ( $\text{CDCl}_3$ ). (i) (*E*)- $\beta$ -ocimene, (ii) sabinene, (iii)  $\alpha$ -phellandrene, (iv) limonene, (v) *p*-cymene, (vi) myrcene

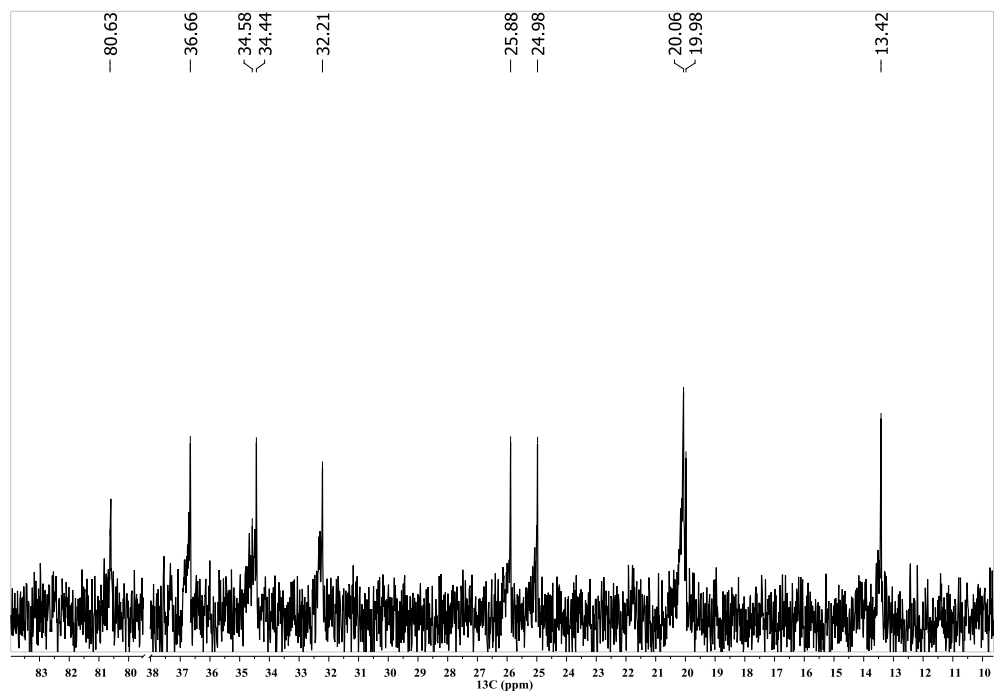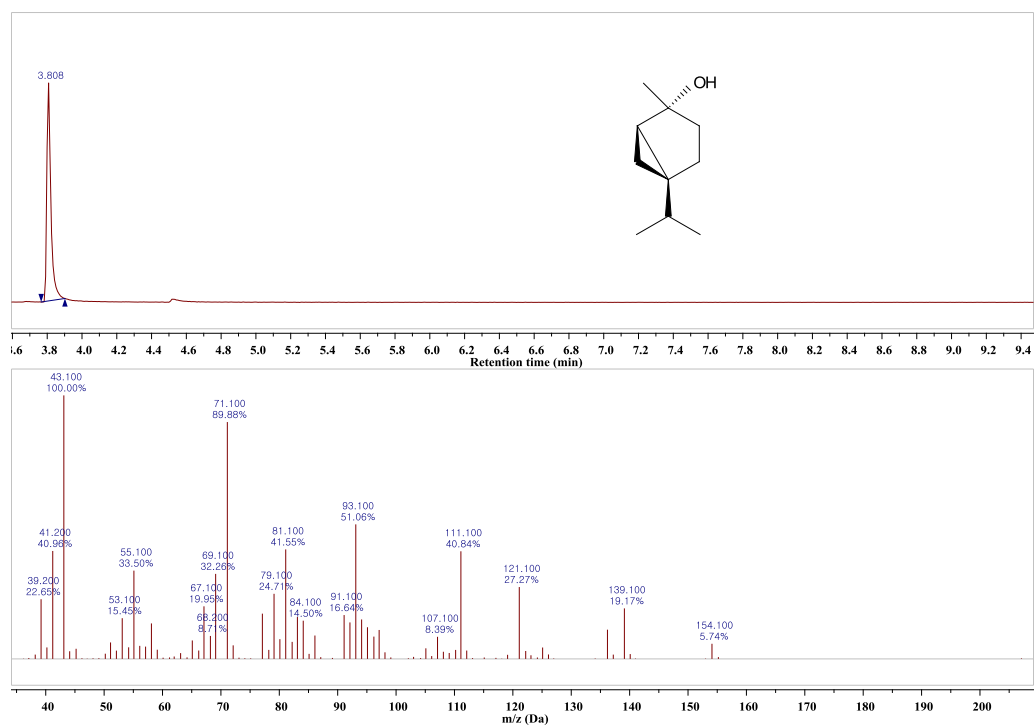

Fig. S4.  $^{13}\text{C}$  NMR and GC-MS spectrum of *trans*-sabinene hydrate

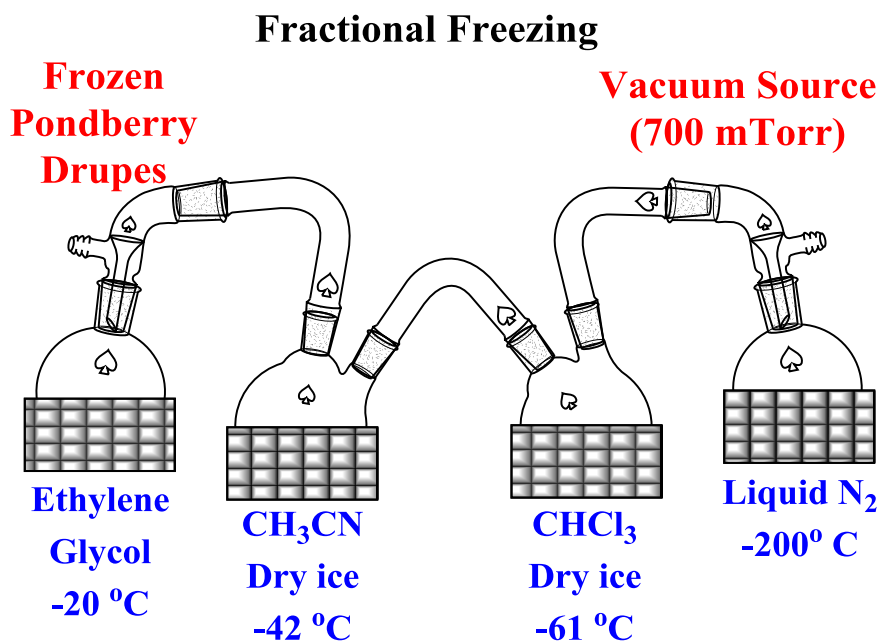

Fig. S5. Schematic diagrams of the fractional freezing apparatus to fractionate pongberry essential oil

Table S1

Mosquito (*Ae. aegypti*) repellency of *Lindera melissifolia* essential oil (Sample A) and hexanes extract (Sample B). The essential oil showed moderate mosquito repellency but the hexanes extract was proven to be ineffective.

| Sample            | MED <sup>a</sup> | SD <sup>b</sup> | SE <sup>c</sup> | HDA <sup>d</sup> |
|-------------------|------------------|-----------------|-----------------|------------------|
| A                 | 0.5              | 0.217           | 0.125           | 1.5              |
| B                 | -                | -               | -               | 0.75             |
| DEET <sup>e</sup> | 0.023            | 0.000           | 0.000           | 1.5              |

<sup>a</sup> Minimum effective dose (mg/cm<sup>2</sup>). <sup>b</sup> Standard deviation. <sup>c</sup> Standard error. <sup>d</sup> Highest dose available (mg/cm<sup>2</sup>). <sup>e</sup> *N,N*-diethyl-3-methylbenzamide.

Table S2

Mosquito (*Ae. aegypti*) repellency minimum effective dose (MED, mg/cm<sup>2</sup>) of the fractions generated by fractional freezing. The fractional freezing can enrich some mosquito repellent components of *Lindera melissifolia* essential based on the observation that the minimum effective doses of -20 and -40 °C were lowered than the one of the pongberry crude oil.

| Fraction          | MED   | SD <sup>a</sup> | SE <sup>b</sup> | HAD <sup>c</sup> |
|-------------------|-------|-----------------|-----------------|------------------|
| -20 °C            | 0.187 | 0.000           | 0.000           | 0.375            |
| -42 °C            | 0.25  | 0.109           | 0.063           | 0.75             |
| -61 °C            | 0.469 | 0.398           | 0.23            | 0.75             |
| -200 °C           | -     | -               | -               | 0.75             |
| DEET <sup>d</sup> | 0.013 | 0.009           | 0.005           | 0.75             |

<sup>a</sup> Standard deviation. <sup>b</sup> Standard error. <sup>c</sup> Highest dose available (mg/cm<sup>2</sup>). <sup>d</sup> *N,N*-diethyl-3-methylbenzamide.

**Table S3**  
**Components identified in the collected essential oil fractions generated by fractional freezing**

| Components                       | Code | -20 °C<br>% | -42 °C<br>% | -61 °C<br>% | -200 °C<br>% |
|----------------------------------|------|-------------|-------------|-------------|--------------|
| $\alpha$ -pinene                 | A    |             | 3.20        | 7.27        | 7.13         |
| $\alpha$ -thujene                | B    |             | 1.52        | 5.46        | 3.47         |
| camphene                         | C    |             | 0.45        |             |              |
| $\beta$ -pinene                  | D    | 0.28        | 0.32        | 2.67        | 2.87         |
| sabinene                         | E    | 9.23        | 61.42       | 62.89       | 70.93        |
| myrcene                          | F    | 0.43        | 1.30        |             |              |
| $\alpha$ -phellandrene           | G    | 0.53        | 6.66        | 4.91        | 2.70         |
| $\alpha$ -terpinene              | H    | 0.47        | 0.50        | 4.56        | 2.16         |
| limonene                         | I    |             | 3.87        | 1.10        | Tr           |
| 1,8-cineole                      | J    | 8.78        | 1.39        | 0.85        | 2.50         |
| ( <i>E</i> )- $\beta$ -ocimene   | K    | 3.53        |             | 1.21        | 1.76         |
| $\gamma$ -terpinene              | L    | 1.64        | 11.04       | 7.14        | 4.71         |
| <i>p</i> -cymene                 | M    | 3.30        | 2.47        | 0.76        | 1.77         |
| 2-methyl butyl 2-methyl butyrate | N    |             | 0.48        |             |              |
| alloocimene                      | O    |             | 0.42        |             |              |
| terpinolene                      | P    | 0.52        | 0.87        | 1.18        |              |
| citronellal                      | Q    | 0.54        | 0.50        |             |              |
| linalool                         | R    | 2.39        |             |             |              |
| geraniol                         | S    | 0.55        |             |             |              |
| bornyl acetate                   | T    | 1.90        | 0.22        |             |              |
| terpinen-4-ol                    | U    | 28.90       | 0.65        |             |              |
| $\alpha$ -terpinyl acetate       | V    | 1.87        |             |             |              |
| $\beta$ -caryophyllene           | W    | 13.80       | 1.69        |             |              |
| $\alpha$ -humulene               | X    | 0.90        | 0.08        |             |              |
| germacrene D                     | Y    | 2.30        | 0.33        |             |              |
| pregeijerene B                   | Z    |             | 0.12        |             |              |
| sabina ketone                    | AA   | 0.30        |             |             |              |
| citronellyl acetate              | AB   | 3.10        | 0.29        |             |              |
| $\alpha$ -copanene               | AC   | 0.37        |             |             |              |
| geranyl acetate                  | AD   | 1.22        |             |             |              |
| $\beta$ -elemene                 | AE   | 0.61        | 0.05        |             |              |
| citronellol                      | AF   | 8.34        | 0.17        |             |              |
| caryophyllene oxide              | AG   | 4.21        |             |             |              |

% Calculated from areas of each peaks corresponding to each components on GC chromatogram.
